# Supplementary material for: Manipulating growth of hyperfine CsPbBr 3 particles by confinement in ZIF-8 and resultant stability of perovskite: selective trace-level Hg 2+ detection
Source: Research Square preprint supplement (doi:10.21203/rs.3.rs-5705692/v1), 2024-12-30
Supplement: Supplementary file 1 [file 8972c3f2eb6d6b56a45175f4.docx]

**Supplementary Material**

**Manipulating growth of hyperfine CsPbBr3 particles by confinement in ZIF-8 and resultant stability of perovskite: selective trace-level Hg2+ detection**

**Lingyu Jiang1, Li Xiang1, Jianshe Tang1,2***

1 Department of Environmental and Energy Engineering, Anhui Jianzhu University, Ziyun Road 292, Hefei 230601, China

2 Anhui Provincial Key Laboratory of Environmental Pollution Control and Resource Reuse, Ziyun Road 292, Hefei 230601, China

CONTACT Prof. **Jianshe Tang**

E-mail: tjs28@126.com

Department of Environment and Energy Engineering, Anhui Jianzhu University, 230601, Hefei, People's Republic of China

Tel: +86-551-63828122

**TableS1** Summary of TRPL decay parameters

| **Sample** | **τ1(ns)** | **A1** | **τ2(ns)** | **A2** | | **τave(ns)** |
| --- | --- | --- | --- | --- | --- | --- |
| CsPbBr3 | 1.47 | 2676.17 | 7.39 | 491.26 | 4.31 | |
| CsPbBr3/ZIF-8 | 2.37 | 1741.51 | 10.78 | 486.58 | 7.07 | |
| CsPbBr3/ZIF-8+Hg2+ | 1.16 | 6872.48 | 6.03 | 627.27 | 2.52 | |


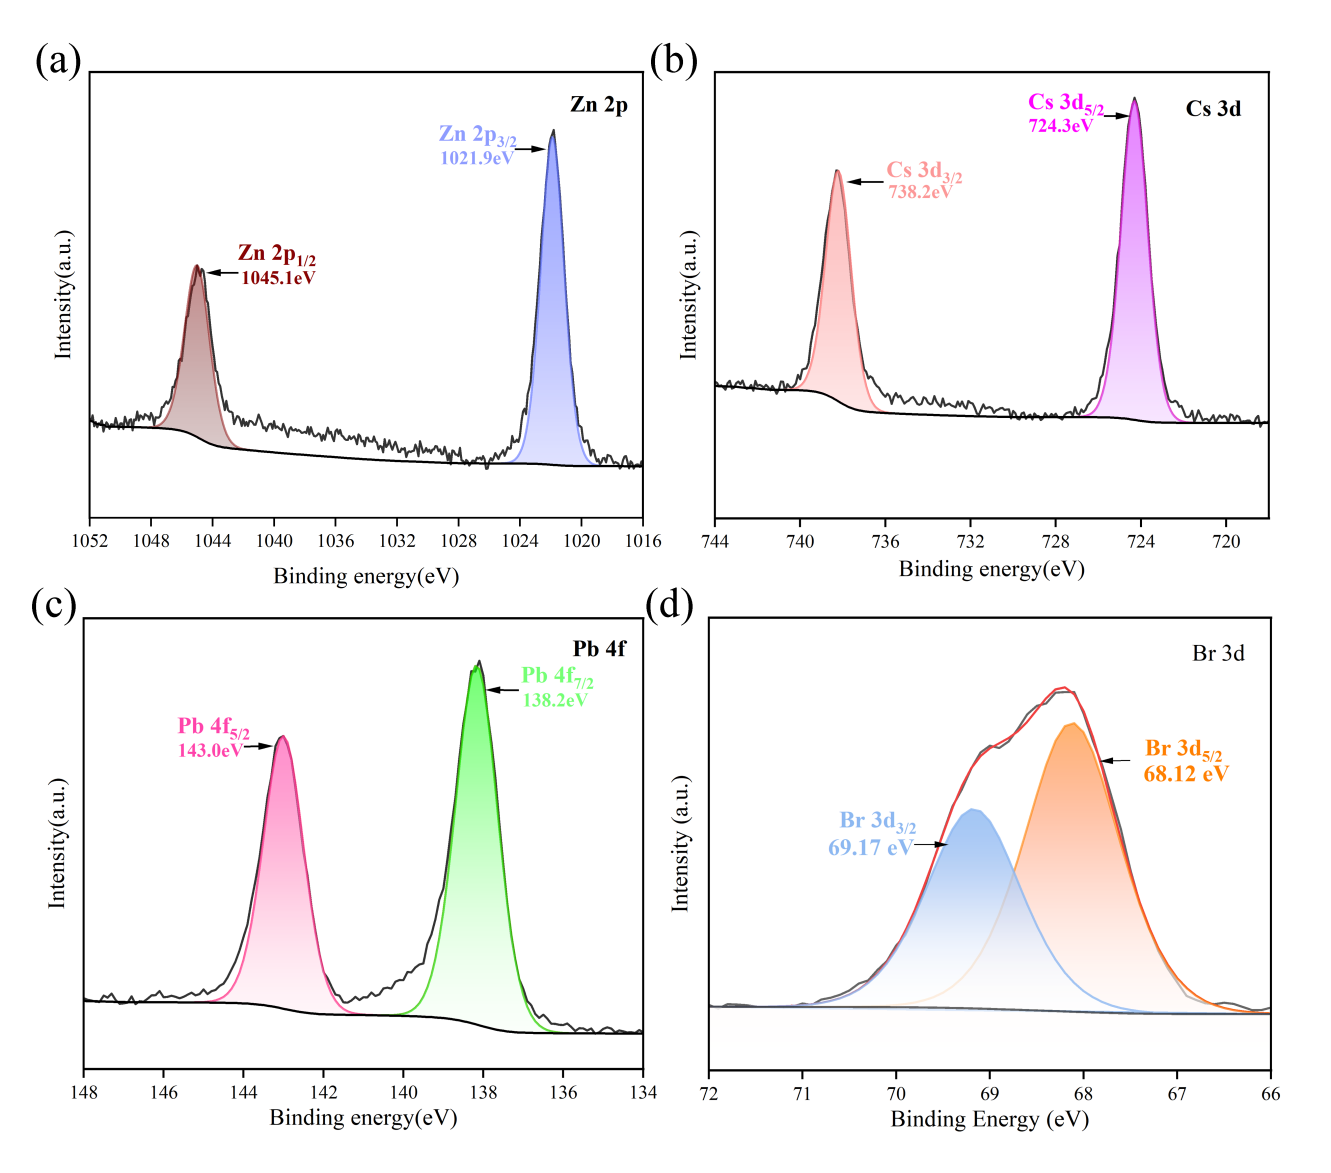


**Figure S1** XPS high resolution spectra of Zn 2p**(a)** Cs 3d **(b)**, Pb 4f **(c)** and Br 3d **(d)** of CsPbBr3/ZIF-8


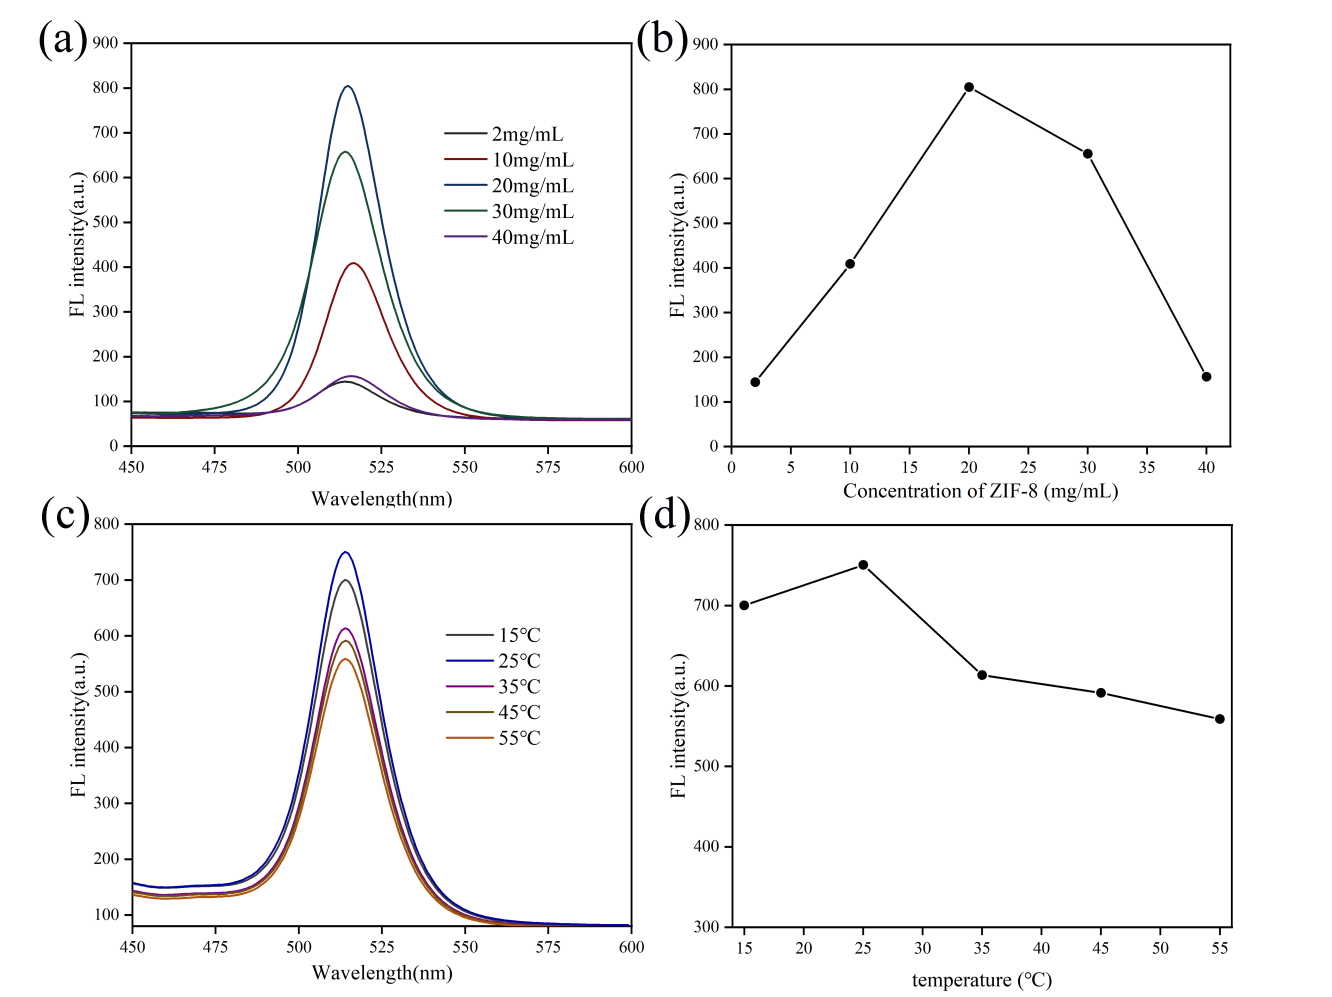


**Figure S2** The impact of ZIF-8 dosage **(a,b)** and reaction temperature **(c,d)** on the fluorescence intensity of CsPbBr3/ZIF-8 during the synthesis process.

**
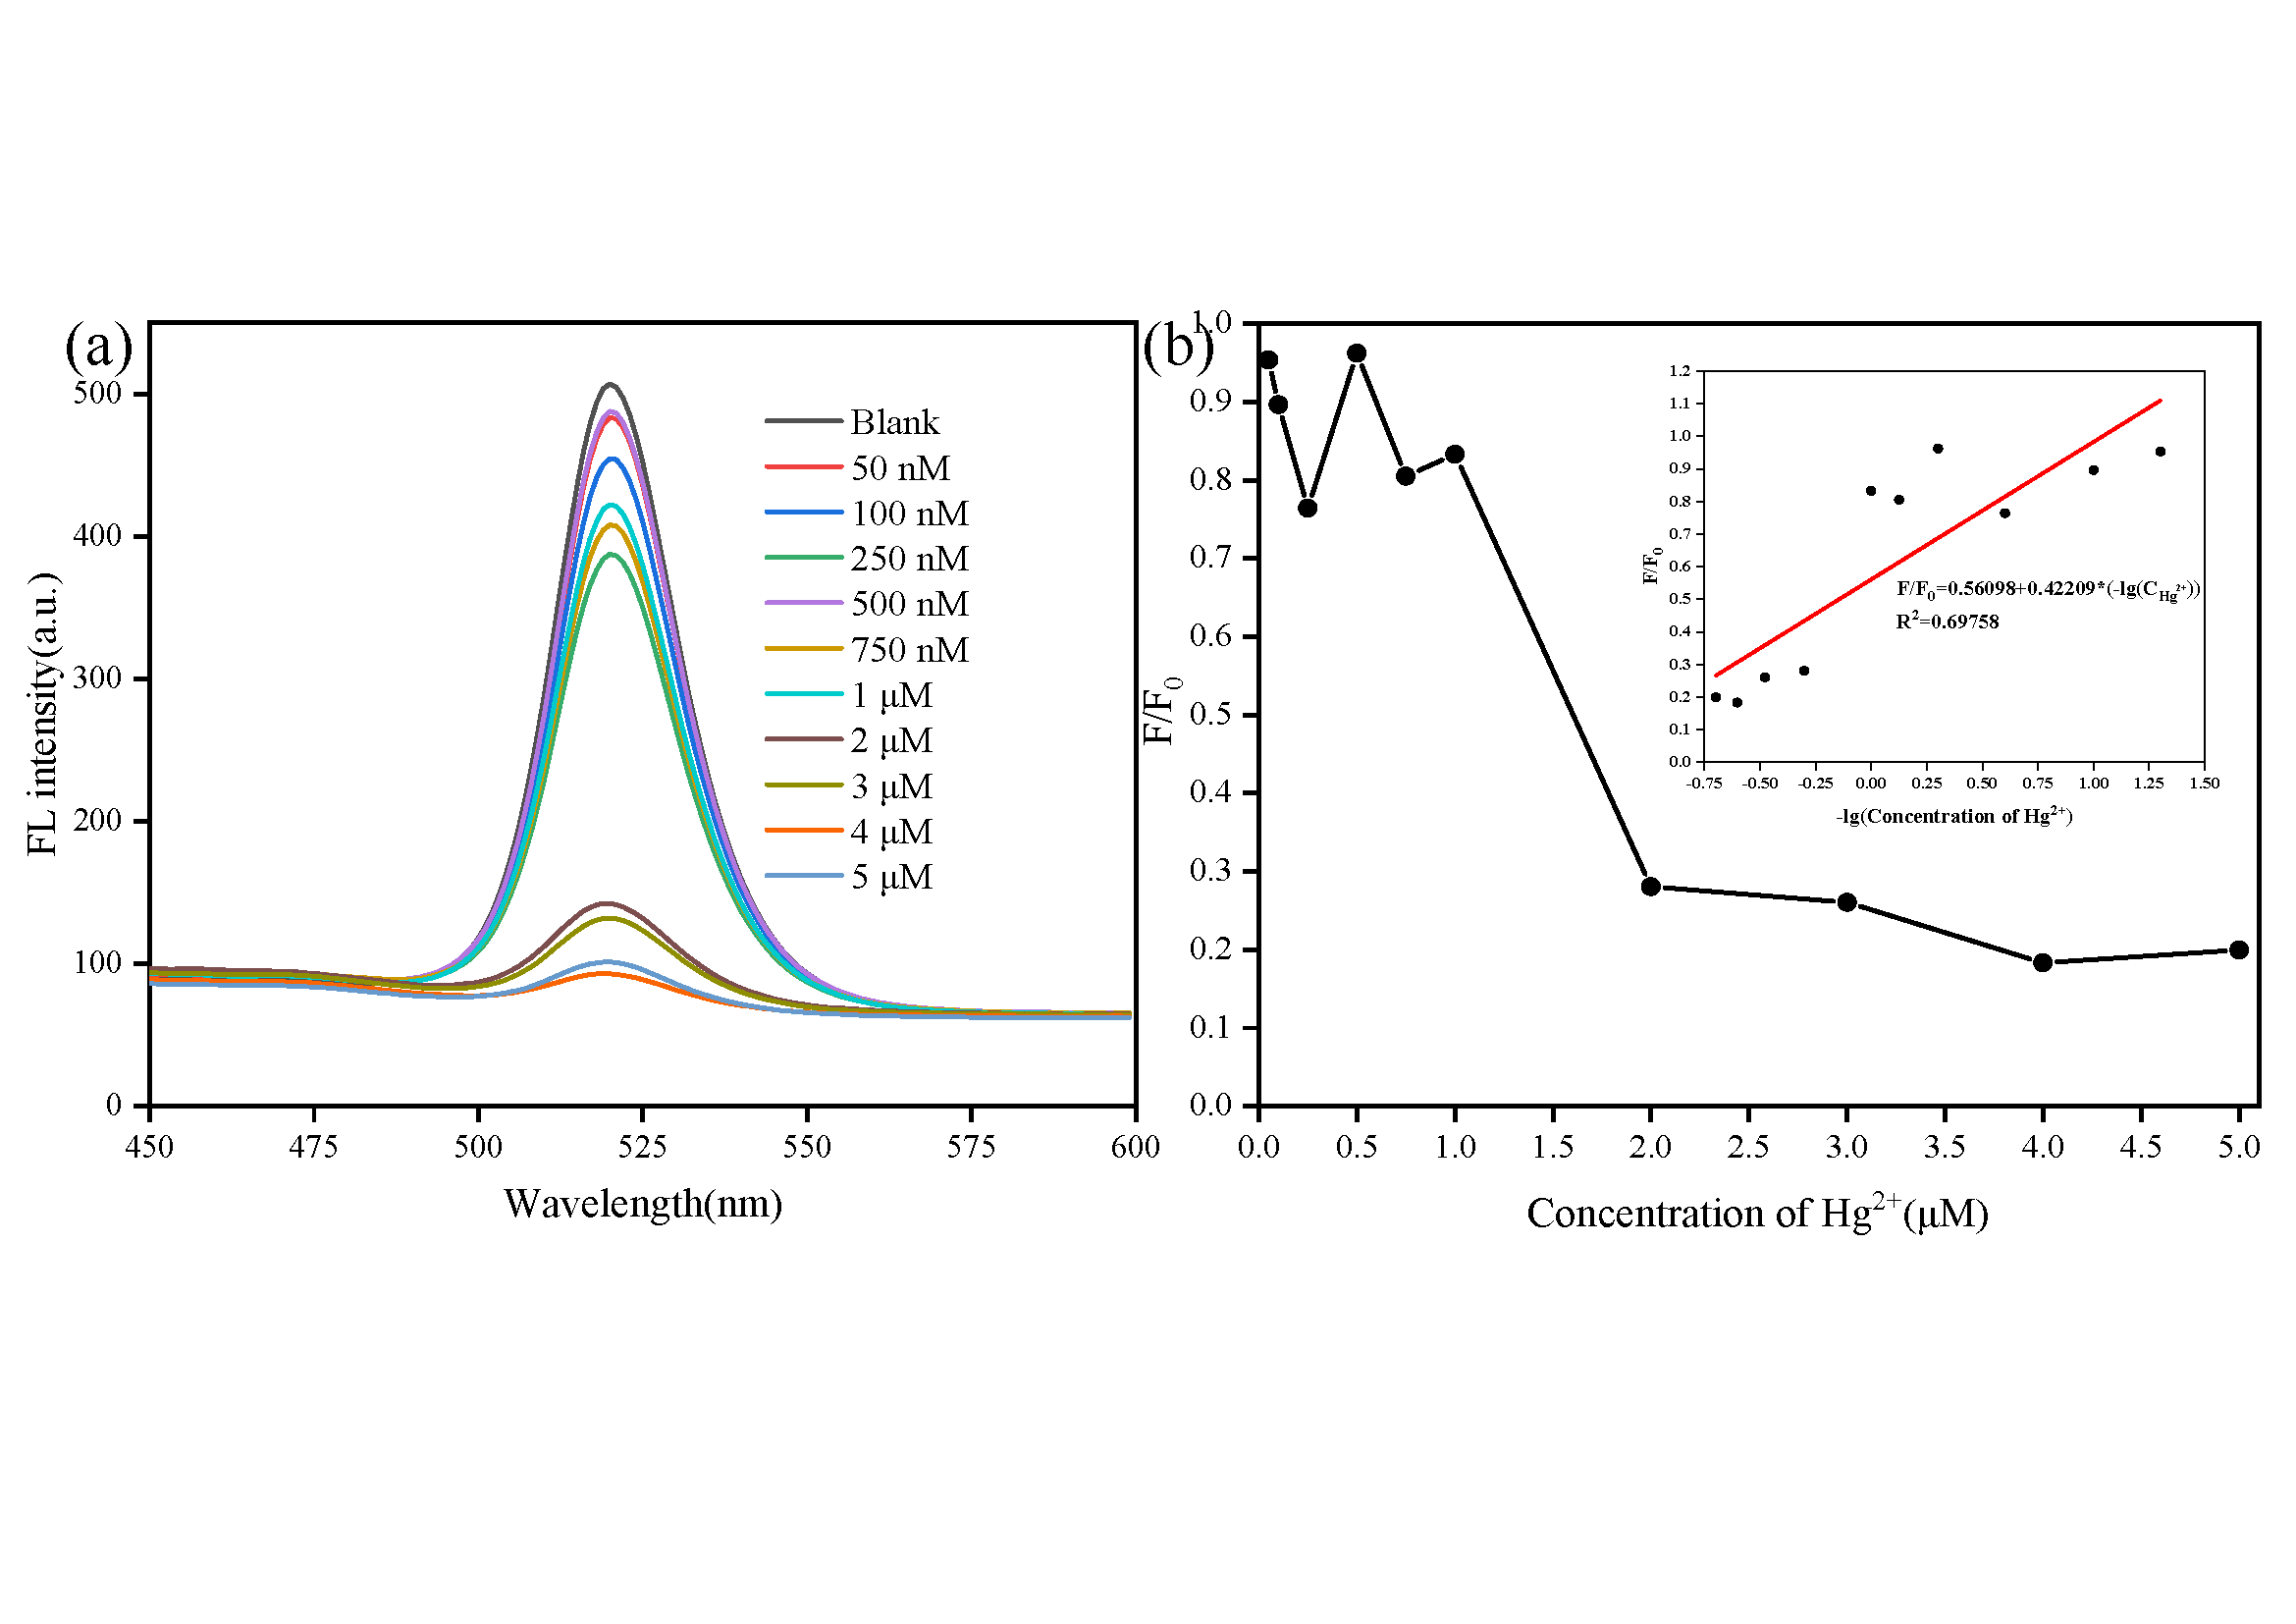
**

**Figure S3(a)** Fluorescence spectra of CsPbBr3 at various concentrations of Hg2+(10~5000nM). **(b)** Linear fitting curve of F/F0 of the fluorescence of CsPbBr3 and -lg(CHg2+).
